# Supplementary material for: An innovative scheme for sub-50 nm patterning via electrohydrodynamic lithography
Source: Royal Society of Chemistry journal article supplement (doi:10.1039/c7nr00749c), 2017-01-01
Supplement: c7nr00749c1.pdf [file c7nr00749c1.pdf]

Supporting Information

## Innovative Scheme for Sub-50 nm Patterning via Electrohydrodynamic Lithography

Suok Lee<sup>a</sup>, Sanghee Jung<sup>a</sup>, A-Rang Jang<sup>c</sup>, Jaeseok Hwang<sup>d</sup>, Hyeon Suk Shin<sup>c</sup>, JaeJong Lee<sup>\*a,b</sup>, Dae Joon Kang<sup>\*d</sup>

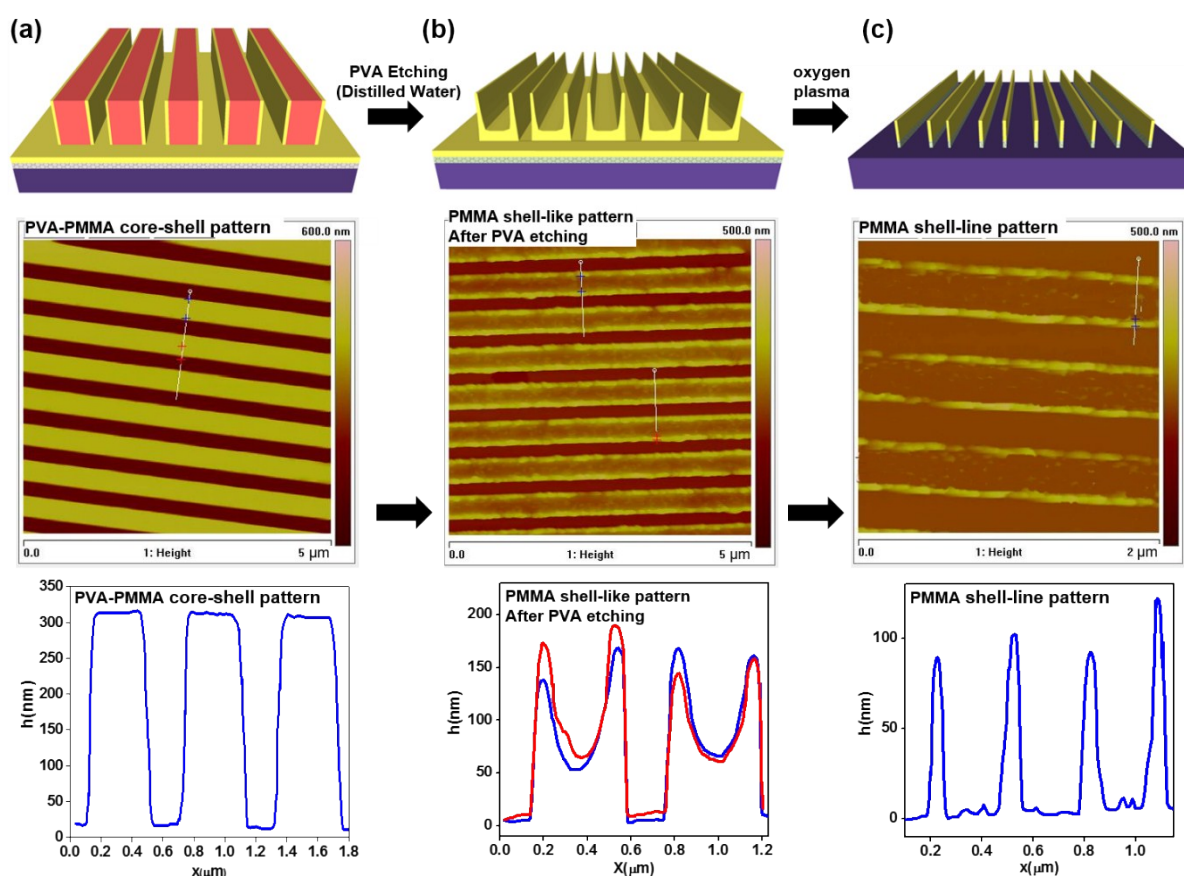

**Fig. S1.** Schematic representation and AFM profiles of the etching process of PVA. (a) PVA-PMMA core-shell-like nanostructure with a width of 300 nm and a height of 300 nm. (b) PMMA shell-like structure after the removal of the PVA core pattern using distilled water. (c) Remaining PMMA shell pattern after the oxygen plasma process.
